# Supplementary material for: Enhancing Water Purification by Integrating Titanium Dioxide Nanotubes into Polyethersulfone Membranes for Improved Hydrophilicity and Anti-Fouling Performance
Source: MDPI journal article supplement (doi:10.3390/membranes14050116), 2024-05-17
Supplement: s1 [file s1]

# Enhancing Water Purification by Integrating Titanium Dioxide Nanotubes into Polyethersulfone Membranes for Improved Hydrophilicity and Anti-Fouling Performance

Ayesha Bilal <sup>1</sup>, Muhammad Yasin <sup>2,\*</sup>, Faheem Hassan Akhtar <sup>3</sup>, Mazhar Amjad Gilani <sup>1</sup>, Hamad Alhmohamadi <sup>4</sup>, Mohammad Younas <sup>5</sup>, Azeem Mushtaq <sup>2,6</sup>, Muhammad Aslam <sup>2</sup>, Mehdi Hassan <sup>7</sup>, Rab Nawaz <sup>8</sup>, Aqsha Aqsha <sup>9</sup>, Jaka Sunarso <sup>10</sup>, Muhammad Roil Bilad <sup>11</sup> and Asim Laeeq Khan <sup>4,\*</sup>

<sup>1</sup> Department of Chemistry, COMSATS University Islamabad, Lahore Campus, Lahore 54000, Pakistan;

<sup>2</sup> Department of Chemical Engineering, COMSATS University Islamabad, Lahore Campus, Lahore 54000, Pakistan

<sup>3</sup> Department of Chemistry and Chemical Engineering, Lahore University of Management Sciences (LUMS), Lahore 54792, Pakistan

<sup>4</sup> Department of Chemical Engineering, Faculty of Engineering, Islamic University of Madinah, Madinah 42351, Saudi Arabia

<sup>5</sup> Department of Chemical Engineering, Faculty of Mechanical, Chemical and Industrial Engineering, University of Engineering and Technology, Peshawar 25120, Pakistan

<sup>6</sup> School of Energy and Environment, City University of Hong Kong, Kowloon Tong, Hong Kong SAR, China

<sup>7</sup> Department of Chemistry, University of Baltistan, Skardu 16100, Pakistan; mehdi.hassan@uobs.edu.pk

<sup>8</sup> Center for Applied Mathematics and Bioinformatics (CAMB), Gulf University for Science and Technology, Hawally 32093, Kuwait

<sup>9</sup> Department of Bioenergy Engineering and Chemurgy, Faculty of Industrial Technology, Institute Teknologi Bandung, Bandung 40132, Indonesia

<sup>10</sup> Research Centre for Sustainable Technologies, Faculty of Engineering, Computing and Science, Swinburne University of Technology, Jalan Simpang Tiga, Kuching 93350, Sarawak, Malaysia

<sup>11</sup> Faculty of Integrated Technologies, Universiti Brunei Darussalam, Gadong BE 1410, Brunei

\* Correspondence: myasin@cuilahore.edu.pk (M.Y.); akhan@iu.edu.sa (A.L.K.)

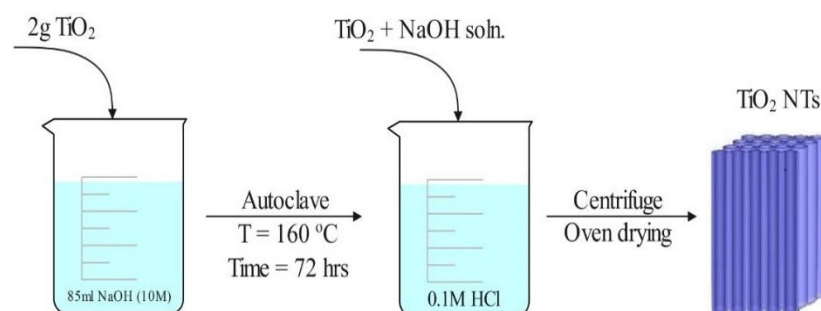

**Figure S1.** Schematic illustration of synthesis process of TiO<sub>2</sub> NTs.

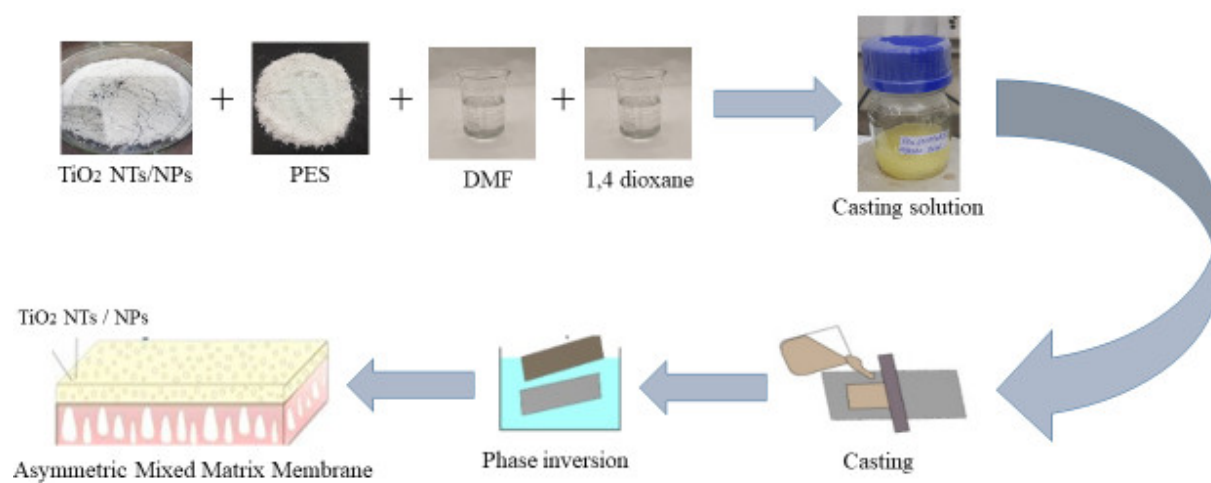

**Figure S2.** Schematic illustration of fabrication of TiO<sub>2</sub> NTs/NPs based MMMs.
